# Supplementary material for: Discussion of the spectral slope of the lidar ratio between 355 nm and 1064 nm from multiwavelength Raman lidar observations
Source: Copernicus journal article supplement (doi:10.5194/egusphere-2025-449), 2025-02-11
Supplement: Supplementary file [file egusphere-2025-449-RC2-supplement.pdf]

## Review of “Discussion of the spectral slope of the lidar ratio between 355 nm and 1064 nm from multiwavelength Raman lidar observations” by M. Haarig, R. Engelmann, H. Baars, B. Gast, D. Althausen, and A. Ansmann

This straightforward manuscript summarizes Raman lidar ratio measurements made by researchers at the Leibniz Institute for Tropospheric Research. These measurements are made at three wavelengths: 355 nm, 532 nm, and 1064 nm. Of these, the 1064 nm measurements are by far the most interesting and significant. Intrinsic aerosol optical properties at 355 nm and 532 nm, including lidar ratios, are reasonably well characterized in the existing literature (e.g., Floutsis et al., 2023). However, to my knowledge, this paper is the first to report *measured* 1064 nm lidar ratios for a wide variety of aerosol types. I expect this information to be especially valuable for space-based lidars – e.g., [LITE](#), [GLAS](#), [CALIPSO](#), [CATS](#), [ACDL](#), and (eventually) [CALIGOLA/Luce](#) – all of which deploy an elastic backscatter channel at 1064 nm. The paper is well-referenced and clearly written and its subject matter is appropriate for ACP. I recommend publication. Though prior to publication, I ask that the authors consider the points raised in the “minor comments” below.

### Minor Comments

This first remark is more a quibble than a useful comment. On lines 32–34 the authors say, “All backscatter lidars [...] need to assume an aerosol-type dependent lidar ratio to derive the extinction coefficient”. While this is generally true, it is not (as implied) always true; e.g., see the papers by Dawson et al., 2015, Liu et al., 2015, and Li et al., 2022.

In Figure 1, consider adding a (red?) vertical line to indicate exactly where 1064.14 nm is in relation to the Raman shifted lines.

On lines 327–329 the authors correctly note that, “An early CALIPSO study by Liu et al. (2008) revealed an increase of 27 – 34 % in the lidar ratio from 532 nm to 1064 nm for Saharan dust over the Atlantic Ocean”. Based on the 2008 publication data, this paper almost certainly used version 2 of the CALIPSO data products. (Version 3 CALIPSO data was not released until November 2009.) Between version 2 and version 4, CALIPSO made a large number of improvements to their 1064 nm calibration algorithm, resulting in substantial changes to the 1064 nm calibration coefficients over most of the globe (Vaughan et al., 2019). In particular, between versions 3 and 4 the changes in the Saharan dust belt are on the order of 20%, with V4 being lower than V3. Because calibration changes of this magnitude will introduce significant changes in the lidar ratios retrieved at 1064 nm, I do not think the Liu et al., 2008 paper offers reliable evidence for a spectral difference in dust lidar ratios.

I very much appreciate the list of “limitations” given by the authors in Appendix 2. Their points should be required reading for all practitioners, as retrievals at 1064 nm are much, much trickier than those at shorter wavelengths.

My final comment has to do with the authors’ recommendation (see lines 474–477) that the CALIPSO project “update the lidar ratio at 1064 nm for these aerosol types [i.e., “*elevated smoke and stratospheric smoke*”] for a CALIPSO v5 algorithm”. Whether this is a sound idea or not is, I believe, open to some debate. If so motivated, the authors could make a better case for adopting their recommendation by testing these higher 1064 nm lidar ratios using CALIOP measurements

to determine what value(s) might be most appropriate. I illustrate this approach with the example shown in Figure 1, taken from Rajapakshe et al., 2017. The lefthand side replicates panels (c) and (d) from Figure 1 in the Rajapakshe paper, which show CALIOP attenuated backscatter coefficients measured at 532 nm (upper panel) and 1064 nm (lower panel) in a biomass burning plume lofted over an opaque stratus off the west coast of Africa on 8 August 2016. The righthand side shows vertical profiles of the attenuated backscatter coefficients averaged over a 20 km (60 single shot profiles) along track distance centered at 01:38 UTC, as shown by the white vertical line in the Rajapakshe image. Profile data are smoothed vertically using a 150 m (5 range bin) sliding average. Extinction coefficients for the smoke layer are retrieved between the base and top altitudes indicated by yellow circles in the righthand image in Figure 1.

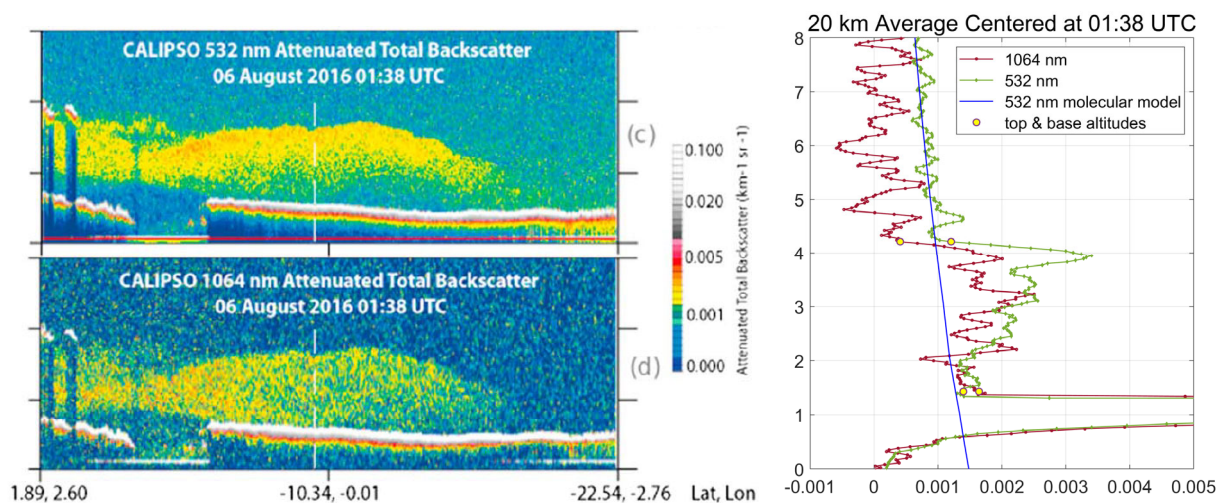

Figure 1: The lefthand side replicates panels (c) and (d) from Figure 1 in Rajapakshe et al., 2017, showing CALIOP attenuated backscatter measurements at 532 nm (upper panel) and 1064 nm (lower panel) of a biomass burning plume lofted over an opaque stratus off the west coast of Africa on 8 August 2016. The righthand side shows vertical profiles of the attenuated backscatter coefficients averaged over a 20 km (60 single shot profiles) distance centered at 01:38 UTC, as shown by the white vertical line in the Rajapakshe image. Top and base altitudes of the smoke plume (identified manually) are indicated using yellow circles. Data are smoothed vertically using a 150 m (5 range bin) sliding average.

Scenes like this are ubiquitous in the CALIPSO measurements during the African biomass burning season. The applicability of the author's recommendation could be tested using the following procedure: (a) estimate 532 nm smoke lidar ratios using measurements of above cloud optical depths provided in the CALIOP level 2 products (e.g., see Hu et al., 2007), and then (b) retrieve backscatter and extinction profiles at 1064 nm lidar ratio using a range of different lidar ratios. The most reasonable choice for a revised 1064 nm lidar ratio would presumably be the one that returns values that compare best with the extinction and backscatter Ångström exponents previously reported for smoke.

Table 2 shows the results of this experiment using the two averaged profiles shown in Figure 1, with 1064 nm lidar ratios varying between 20 sr and 85 sr. For the 20 km average in the Rajapakshe scene, CALIOP retrieves a mean above cloud optical depth of  $\sim 0.629$ , suggesting an approximate 532 nm lidar ratio of 90 sr rather than the CALIOP default of 70 sr. In this simple test, using a 1064 nm lidar ratio of 82 sr (i.e., as in Table 4) yields an EAE of 0.04, which is very different from

the authors' retrieved value of 0.6 (Table 6). Instead, a 1064 nm lidar ratio just under 65 sr should give the closest match. Alternatively, based on the very sparse information available in the existing literature, one might expect the 1064-to-532 EAE to be in the neighborhood of 1.4 to 1.8, as in Chand et al., 2008 and Wu et al., 2012. For this range of values, 1064 nm lidar ratios between 35 sr to 45 sr provide the closest matches. Nowhere in this table does the BAE get close to the authors' retrieved value of 0.8. The largest value (~0.59) is found for a lidar ratio of 20 sr. When the 1064 nm lidar ratio is fixed at 82 sr, the resulting BAE is an order of magnitude smaller than the authors' value and has the opposite sign (i.e., -0.09). Also contrary to the authors' mean value, the SAE in Table 1 never drops below zero. I can only speculate that the reasons for these disparities lie in differences in the optical properties for the relatively fresh biomass burning aerosol CALIOP measured off the coast of Africa versus those for aged smoke transported to the interior of Europe. So, while it may well be that a higher 1064 nm smoke lidar ratio is warranted for the CALIOP retrievals, it is not at all clear what value would be consistent with the authors' measurements.

Table 1: backscatter and extinction Ångström exponents computed for 1064 nm lidar ratios varying between 20 sr and 85 sr and a 532 nm lidar ratio of 90 sr.

| $\lambda$ | S     | $\tau$ | EAE     | BAE     | SAE    |
|-----------|-------|--------|---------|---------|--------|
| 532 nm    | 90 sr | 0.6310 | N/A     | N/A     | N/A    |
| 1064 nm   | 20 sr | 0.0933 | 2.7578  | 0.5894  | 2.1684 |
| 1064 nm   | 25 sr | 0.1198 | 2.3976  | 0.5513  | 1.8463 |
| 1064 nm   | 30 sr | 0.1478 | 2.0945  | 0.5115  | 1.5831 |
| 1064 nm   | 35 sr | 0.1775 | 1.8301  | 0.4697  | 1.3604 |
| 1064 nm   | 40 sr | 0.2091 | 1.5933  | 0.4257  | 1.1675 |
| 1064 nm   | 45 sr | 0.2430 | 1.3767  | 0.3794  | 0.9973 |
| 1064 nm   | 50 sr | 0.2794 | 1.1753  | 0.3303  | 0.8450 |
| 1064 nm   | 55 sr | 0.3188 | 0.9851  | 0.2781  | 0.7070 |
| 1064 nm   | 60 sr | 0.3616 | 0.8033  | 0.2223  | 0.5811 |
| 1064 nm   | 65 sr | 0.4085 | 0.6273  | 0.1623  | 0.4650 |
| 1064 nm   | 70 sr | 0.4604 | 0.4548  | 0.0973  | 0.3575 |
| 1064 nm   | 75 sr | 0.5185 | 0.2835  | 0.0263  | 0.2571 |
| 1064 nm   | 80 sr | 0.5843 | 0.1111  | -0.0520 | 0.1630 |
| 1064 nm   | 82 sr | 0.6133 | 0.0412  | -0.0858 | 0.1269 |
| 1064 nm   | 85 sr | 0.6603 | -0.0653 | -0.1396 | 0.0743 |

I note too that should the authors conduct tests like this to buttress their recommendation for increasing CALIOP's 1064 nm lidar ratio, the results will, as expected, depend very much on the accuracy of the 532 nm extinction retrievals. Table 2 shows the same set of calculations as Table 1, but using CALIOP's default 532 nm smoke lidar ratio of 70 sr. (Actually, since conducting these tests seems like a long and laborious task, I suspect the authors would be better served by simply omitting their recommendation from their final manuscript. But, included or not, I firmly recommend this paper be published.)

Table 2: backscatter and extinction Ångström exponents computed for 1064 nm lidar ratios varying between 20 sr and 85 sr and a 532 nm lidar ratio of 70 sr.

| $\lambda$ | S     | T      | EAE     | BAE     | SAE     |
|-----------|-------|--------|---------|---------|---------|
| 532 nm    | 70 sr | 0.3579 | N/A     | N/A     | N/A     |
| 1064 nm   | 20 sr | 0.0933 | 1.9395  | 0.1372  | 1.8023  |
| 1064 nm   | 25 sr | 0.1198 | 1.5793  | 0.0991  | 1.4802  |
| 1064 nm   | 30 sr | 0.1478 | 1.2763  | 0.0593  | 1.2169  |
| 1064 nm   | 35 sr | 0.1775 | 1.0119  | 0.0175  | 0.9943  |
| 1064 nm   | 40 sr | 0.2091 | 0.7750  | -0.0264 | 0.8014  |
| 1064 nm   | 45 sr | 0.2430 | 0.5584  | -0.0727 | 0.6312  |
| 1064 nm   | 50 sr | 0.2794 | 0.3570  | -0.1218 | 0.4788  |
| 1064 nm   | 55 sr | 0.3188 | 0.1669  | -0.1740 | 0.3409  |
| 1064 nm   | 60 sr | 0.3616 | -0.0149 | -0.2299 | 0.2149  |
| 1064 nm   | 65 sr | 0.4085 | -0.1910 | -0.2899 | 0.0989  |
| 1064 nm   | 70 sr | 0.4604 | -0.3635 | -0.3548 | -0.0087 |
| 1064 nm   | 75 sr | 0.5185 | -0.5348 | -0.4258 | -0.1090 |
| 1064 nm   | 80 sr | 0.5843 | -0.7072 | -0.5041 | -0.2031 |
| 1064 nm   | 82 sr | 0.6133 | -0.7771 | -0.5379 | -0.2392 |
| 1064 nm   | 85 sr | 0.6603 | -0.8836 | -0.5917 | -0.2918 |

## References

- Chand et al., 2008: Quantifying above-cloud aerosol using spaceborne lidar for improved understanding of cloudy-sky direct climate forcing, *J. Geophys. Res.*, **113**, D13206, <https://doi.org/10.1029/2007JD009433>.
- Dawson, K. et al., 2015: Spaceborne observations of the lidar ratio of marine aerosols, *Atmos. Chem. Phys.*, **15**, 3241–3255, <https://doi.org/10.5194/acp-15-3241-2015>.
- Floutsis, A. A. et al., 2023: DeLiAn – a growing collection of depolarization ratio, lidar ratio and Ångström exponent for different aerosol types and mixtures from ground-based lidar observations, *Atmos. Meas. Tech.*, **16**, 2353–2379, <https://doi.org/10.5194/amt-16-2353-2023>.
- Hu, Y. et al., 2007: Retrieving Optical Depths and Lidar Ratios for Transparent Layers Above Opaque Water Clouds from CALIPSO Lidar Measurements, *IEEE Geosci. Remote Sens. Lett.*, **4**, 523–526, <https://doi.org/10.1109/LGRS.2007.901085>.
- Li, Z. et al., 2022: Assessment of tropospheric CALIPSO Version 4.2 aerosol types over the ocean using independent CALIPSO-SODA lidar ratios, *Atmos. Meas. Tech.*, **15**, 2745–2766, <https://doi.org/10.5194/amt-15-2745-2022>.
- Liu, Z. et al., 2015: Evaluation of CALIOP 532-nm AOD over Opaque Water Clouds, *Atmos. Chem. Phys.*, **15**, 1265–1288, <https://doi.org/10.5194/acp-15-1265-2015>.

Rajapakshe, C. et al., 2017: Seasonally Transported Aerosol Layers over Southeast Atlantic are Closer to Underlying Clouds than Previously Reported, *Geophys. Res. Lett.*, **44**, <https://doi.org/10.1002/2017GL073559>.

Vaughan, M. et al., 2019: CALIPSO Lidar Calibration at 1064 nm: Version 4 Algorithm, *Atmos. Meas. Tech.*, **12**, 51–82, <https://doi.org/10.5194/amt-12-51-2019>.

Wu et al., 2012: Smoke plume optical properties and transport observed by a multi-wavelength lidar, sunphotometer and satellite, *Atmos. Environ.*, **63**, 32–42, <https://doi.org/10.1016/j.atmosenv.2012.09.016>.
